# Supplementary material
Source: publisher figshare collection journal article supplement (https://acs.figshare.com/ndownloader/files/25730003)
Supplement: Supplementary file 1 [file 25730003]

## **SUPPORTING INFORMATION FOR**

### **Gut microbiota-derived metabolite signature in suckling and weaned piglets**

Martin Beaumont<sup>1\*</sup>, Laurent Cauquil<sup>1</sup>, Allan Bertide<sup>1,2</sup>, Ingrid Ahn<sup>1</sup>, Céline Barilly<sup>1</sup>, Lisa Gil<sup>3</sup>, Cécile Canlet<sup>4</sup>, Olivier Zemb<sup>1</sup>, Géraldine Pascal<sup>1</sup>, Arnaud Samson<sup>2</sup>, Sylvie Combes<sup>1</sup>

1 - GenPhySE, Université de Toulouse, INRAE, ENVT, F-31326, Castanet-Tolosan, France.

2 - Neovia-ADM, Rue de l'Eglise, 02402 Château-Thierry Cedex, France

3 - GeT-PlaGe, Genotoul, INRAE, F-31326, Castanet-Tolosan, France

4 - Toxalim (Research Centre in Food Toxicology), Université de Toulouse, INRAE, ENVT, INP-Purpan, UPS, Toulouse, France

\*Corresponding author: martin.beaumont@inrae.fr

#### **Table of Contents**

Table S1. Chemical composition of sow and piglet diets.

Table S2. Univariate statistical analysis of metabolites relative concentrations in piglet feces.

Table S3. Univariate statistical analysis of microbial  $\alpha$ -diversity metrics in piglet feces.

Table S4. Univariate statistical analysis of bacterial phyla relative abundance in piglet feces.

Table S5. Univariate statistical analysis of bacterial family relative abundance in piglet feces.

Table S6. Univariate statistical analysis of bacterial genera relative abundance in piglet feces.

Table S7. Univariate statistical analysis of OTU relative abundance in piglet feces.

Table S8. Univariate statistical analysis of predicted bacterial pathways relative abundance in piglet feces.

Table S9. Univariate statistical analysis of the relative contribution of each OTU to the pathway “Fucose degradation”.

Table S10. Univariate statistical analysis of the relative contribution of each OTU to the pathway “Starch degradation V”.

Table S11. Spearman correlations between the relative concentrations of bacterial metabolites and the relative abundances of bacterial families - Correlation coefficients.

Table S12. Spearman correlations between the relative concentrations of bacterial metabolites and the relative abundances of bacterial families - P-values.

Table S13. Spearman correlations between the relative concentrations of bacterial metabolites and the relative abundances of predicted functional pathways - Correlation coefficients.

Table S14. Spearman correlations between the relative concentrations of bacterial metabolites and the relative abundances of predicted functional pathways. P-values.

Figure S1. Heatmap representing the Spearman correlation coefficient between the relative concentrations of metabolites and the relative abundances of bacterial families.

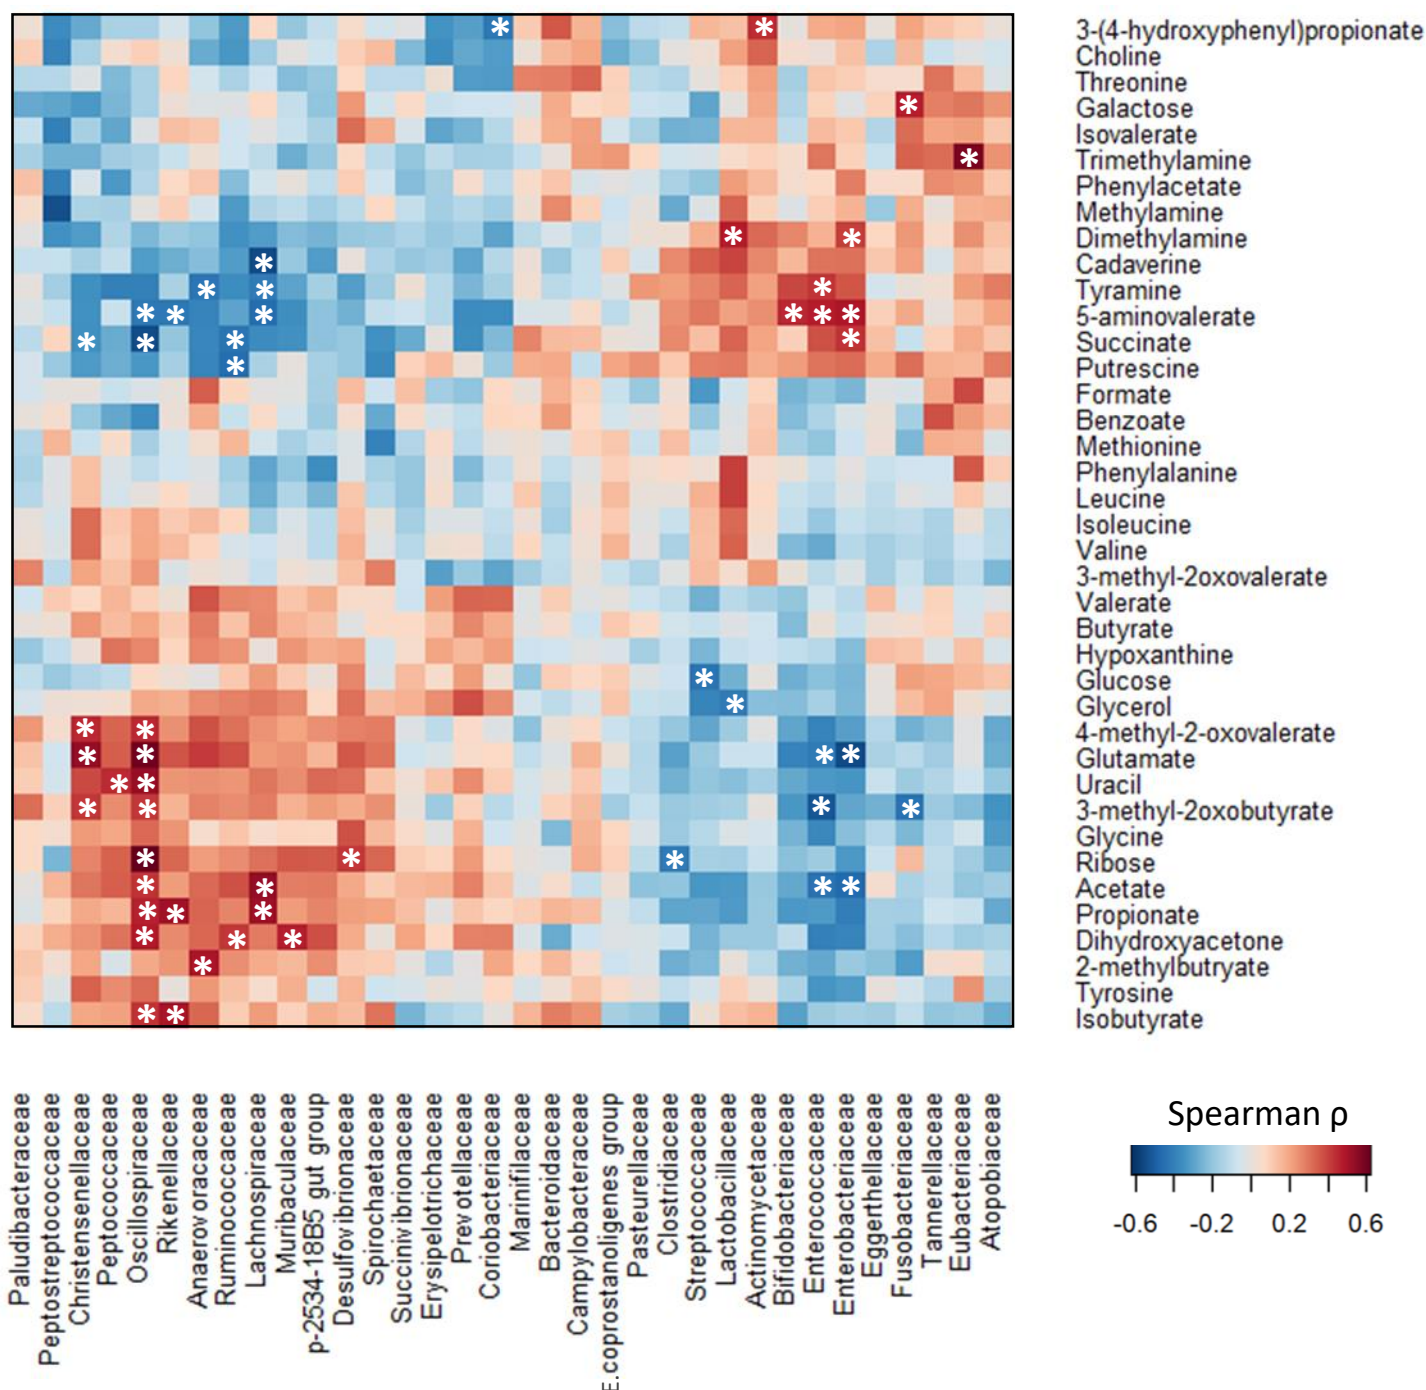

**Figure S1: Correlation analysis.** The full dataset (n=56 piglet fecal samples) was used for correlation analysis. The heatmap represents the Spearman correlation coefficient between the relative concentrations of metabolites (rows) and the relative abundances of bacterial families (columns). Rows and columns were clustered with the average method. Negative correlations are represented in blue and positive correlations in red. \*: adjusted P-value < 0.05.
